# Supplementary material for: Carotenoids from Persimmon (Diospyros kaki Thunb.) Byproducts Exert Photoprotective, Antioxidative and Microbial Anti-Adhesive Effects on HaCaT
Source: MDPI journal article supplement (doi:10.3390/pharmaceutics13111898), 2021-11-08
Supplement: s1 [file s1]

# Supplementary Materials: Carotenoids from Persimmon (*Diospyros kaki* Thunb.) Byproducts Exert Photoprotective, Antioxidative and Microbial Anti-Adhesive Effects on HaCaT

Sara Gea-Botella, Bryan Moreno-Chamba, Laura de la Casa, Julio Salazar-Bermeo, Nuria Martí, María Concepción Martínez-Madrid, Manuel Valero and Domingo Saura

**Table S1.** Gradient conditions used for carotenoid analysis.

| Time (min) | Flow (mL/min) | Flow Rate |       |
|------------|---------------|-----------|-------|
|            |               | A (%)     | B (%) |
| Initial    | 0.5           | 40        | 60    |
| 3          | 0.5           | 70        | 30    |
| 22         | 0.5           | 70        | 30    |
| 26         | 0.5           | 90        | 10    |
| 41.5       | 0.5           | 90        | 10    |
| 3.5        | 0.5           | 40        | 60    |

LC column: YMC Carotenoid HPLC Column, C30, 4.6 × 250 mm, 5 µm (Teknokroma Analítica, Sant Cugat del Vallès, Barcelona, Spain); Column oven temperature at 25 °C; Mobile phase A: methanol/acetone (60/40); Mobile phase B: acetone/water (60/40).

**Table S2.** MS Parameter settings used for carotenoid analysis: LCMS8050TM (Shimadzu).

| ESI                          | Positive |
|------------------------------|----------|
| Capillary (kV)               | 4.5      |
| IF Temperature (°C)          | 300      |
| DL Temperature (°C)          | 200      |
| BH Temperature (°C)          | 300      |
| Desolvation gas flow (L/min) | 5        |
| Nebuliser gas flow (L/min)   | 3        |
| Desolvation Temperature (°C) | 526      |
| Scan Range (m/z)             | 100–1000 |

**Table S3.** Annotation and detection conditions for carotenoid analysis.

| Peak | Carotenoid                          | Ret. Time | $\lambda_{\max}$ (nm) | [M + H] <sup>+</sup> (m/z) | Fragment Ions (m/z)        | CE  | Relative Concentration (%) | Franz Cells |
|------|-------------------------------------|-----------|-----------------------|----------------------------|----------------------------|-----|----------------------------|-------------|
| 1    | (All-trans)-lutein                  | 2.224     | 450/654               | 552                        | 492,539,268,519            | -15 | 7.306                      | -           |
| 2    | zeinoxanthin                        | 2.704     | 444/455               | 552                        | 414,485,495,506,493,552    | -15 | 0.740                      | -           |
| 3    | (cis)-lutein                        | 3.304     | 361/455               | 552                        | 466,184,186,266,235,425    | -35 | 3.063                      | -           |
| 4    | luteoxanthin                        | 5.628     | 400/421               | 586                        | 528                        | -15 | 1.936                      | -           |
| 5    | (all-trans)-violaxanthin            | 6.028     | 403/471               | 586                        | 527,568,529,549            | -15 | 1.893                      | -           |
| 6    | (cis)-violaxanthin                  | 8.336     | 319/406               | 586                        | 364,265,309,295,528        | -35 | 2.005                      | -           |
| 7    | (all-trans)-antheraxanthin          | 10.420    | 420/470               | 586                        | 528,474,406,568            | -35 | 8.510                      | -           |
| 8    | (cis)-antheraxanthin                | 13.832    | 319/438/              | 586                        | 527,298,540,518            | -15 | 10.319                     | -           |
| 9    | $\beta$ -cryptoxanthin 5,6-epoxide  | 25.952    | 420/445               | 536                        | 176,282,325,386,271        | -15 | 4.157                      | -           |
| 10   | 5,6-epoxy- $\alpha$ -carotene       | 27.772    | 418/445               | 552                        | 328,280,56,127,110,331,551 | -35 | 1.265                      | -           |
| 11   | (all-trans)-zeaxanthin              | 30.488    | 417/651               | 586                        | 527,461                    | -15 | 0.852                      | -           |
| 12   | (cis)- $\alpha$ -cryptoxanthin      | 30.724    | 399/490               | 552                        | 109,187,304,349,494        | -15 | 0.030                      | +           |
| 13   | (cis)- $\beta$ -cryptoxanthin       | 31.176    | 319/421               | 552                        | 305,459,96,524,177         | -15 | 3.239                      | +           |
| 14   | (cis)- $\alpha$ -carotene           | 31.612    | 319/490               | 536                        | 223,268,307,280            | -15 | 0.702                      | +           |
| 15   | (cis)- $\beta$ -carotene            | 31.928    | 319/401               | 536                        | 223,268,307,280            | -15 | 1.221                      | +           |
| 16   | (all-trans)- $\alpha$ -carotene     | 32.364    | 409/490               | 536                        | 186,363,162,210            | -15 | 1.784                      | +           |
| 17   | (all-trans)- $\beta$ -carotene      | 33.216    | 490/683               | 536                        | 478,535,400                | -15 | 3.137                      | +           |
| 18   | (All-trans)- $\beta$ -cryptoxanthin | 36.764    | 452/683               | 553                        | 495,426,460,201,307        | -15 | 44.805                     | -           |
| 19   | (all-E)-lycopene                    | 37.808    | 319/490               | 536                        | 356,444,192                | -15 | 1.467                      | -           |
| 20   | (cis)-lycopene isomer               | 41.888    | 319/399               | 536                        | 318,468,477,223,382        | -15 | 0.529                      | -           |
